# Supplementary material for: Harmful Effects of the Azathioprine Metabolite 6-Mercaptopurine in Vascular Cells: Induction of Mineralization
Source: PubMed Central journal article supplement (PMC4100760; doi:10.1371/journal.pone.0101709), 2014-07-16
Supplement: pone.0101709.s008.pdf [file pone.0101709.s008.pdf]

## Tables

Table S1: Primer sequences.

| <b>Gene</b> | <b>Species</b> | <b>Oligonucleotide sequence (5' - 3')</b>                             | <b>[bp]</b> |
|-------------|----------------|-----------------------------------------------------------------------|-------------|
| Xdh         | rat            | fwd. TGG ACA AGT AGA GGG GGC AT<br>rev. ACA CAG GCG TTT CGG ATC TT    | 351         |
| HRPT1       | rat            | fwd. CAG TCC CAG CGT CGT GAT TA<br>rev. TGG CCT CCC ATC TCC TTC AT    | 168         |
| IMPDH1      | rat            | fwd. CAT GGA GGA ACC GCT CTC AC<br>rev. CTC AAA CTT CTT GAC CTT CCG C | 505         |
| TPMT        | rat            | fwd. TCC CCT CTC TTT GGA GCA GA<br>rev. ATC TGC ATA GCG GTC ACG AT    | 104         |
